# Supplementary material
Source: PubMed Central journal article supplement (PMC9292403)
Supplement: FSB2-32-4878-s001.pdf [file FSB2-32-4878-s001.pdf]

Table S1. Raw data of metabolomics-normal groups

| Index | Platform | Name                           | N01pre | N02pre | N03pre | N04pre | N05pre | N06pre | N07pre | N08pre | N09pre | N01post | N02post | N05post | N06post | N07post | N08post | N09post | N10post | N11post |
|-------|----------|--------------------------------|--------|--------|--------|--------|--------|--------|--------|--------|--------|---------|---------|---------|---------|---------|---------|---------|---------|---------|
| 1     | GC       | 2-Hydroxy-3-methylbutyric acid | 47257  | 57278  | 47522  | 51007  | 31117  | 56307  | 55674  | 48178  | 49551  | 63619   | 23634   | 25909   | 47330   | 18920   | 68846   | 18396   | 30398   | 25344   |
| 2     | GC       | 2-Hydroxybutyric acid          | 21709  | 29255  | 40942  | 20296  | 33997  | 29209  | 37748  | 23037  | 34241  | 88144   | 14217   | 11950   | 47441   | 8560    | 60515   | 5117    | 18705   | 11717   |
| 3     | GC       | 2-Hydroxypyridine              | 37927  | 45534  | 73218  | 41334  | 31033  | 44599  | 89618  | 38040  | 41803  | 30130   | 64422   | 125123  | 46759   | 35218   | 34075   | 26324   | 36303   | 36441   |
| 4     | GC       | 3-Methyl-2-oxovaleric acid     | 7717   | 8044   | 15660  | 12887  | 12306  | 13642  | 15617  | 12549  | 15151  | 10107   | 9449    | 3706    | 7634    | 5393    | 7543    | 5642    | 12738   | 7378    |
| 5     | GC       | Acetylglycine                  | 13422  | 11908  | 4429   | 10439  | 12959  | 11905  | 3909   | 9769   | 11158  | 6535    | 2507    | 475     | 8854    | 4315    | 9998    | 3301    | 5744    | 5708    |
| 6     | GC       | Alpha-ketoisovaleric acid      | 695    | 798    | 864    | 812    | 747    | 735    | 716    | 723    | 815    | 775     | 292     | 562     | 602     | 487     | 518     | 518     | 582     | 490     |
| 7     | GC       | Aminomalonic acid              | 7805   | 9852   | 6726   | 5360   | 4526   | 5168   | 5220   | 5857   | 5699   | 6689    | 13820   | 8018    | 9320    | 10285   | 8925    | 8466    | 9052    | 7932    |
| 8     | GC       | Arachidonic acid               | 9734   | 8488   | 10631  | 5731   | 5297   | 6541   | 7613   | 7922   | 6376   | 4844    | 6801    | 5728    | 3856    | 4147    | 4986    | 3867    | 4898    | 3963    |
| 9     | GC       | Benzoic acid                   | 1913   | 1882   | 2566   | 2954   | 4084   | 2759   | 6368   | 3576   | 2660   | 1606    | 3229    | 4420    | 2862    | 2557    | 2522    | 2428    | 2554    | 2203    |
| 10    | GC       | Beta-Alanine                   | 2560   | 2146   | 932    | 1572   | 2711   | 1777   | 3625   | 1785   | 1400   | 2287    | 2328    | 1942    | 2124    | 1391    | 2365    | 1253    | 1552    | 1353    |
| 11    | GC       | Cholesterol                    | 154172 | 139425 | 175819 | 137848 | 124146 | 143585 | 159087 | 158012 | 159329 | 146808  | 220012  | 215225  | 151290  | 163307  | 157341  | 155819  | 137602  | 138210  |
| 12    | GC       | cis-4-Hydroxy-L-proline        | 13139  | 11188  | 16521  | 9712   | 11841  | 9495   | 11109  | 10923  | 8353   | 9547    | 15436   | 17047   | 4339    | 18357   | 10481   | 18048   | 12084   | 19091   |
| 13    | GC       | Citrulline                     | 5283   | 4678   | 4807   | 4630   | 6223   | 5495   | 5185   | 4561   | 5189   | 7075    | 4302    | 6344    | 5759    | 4701    | 7263    | 5039    | 4543    | 5062    |
| 14    | GC       | Creatinine                     | 197598 | 131174 | 180699 | 178454 | 103830 | 170239 | 91114  | 182411 | 183795 | 136323  | 78262   | 82259   | 84953   | 75402   | 216509  | 86120   | 75831   | 83604   |
| 15    | GC       | D-Galactose                    | 6961   | 5637   | 5920   | 3636   | 7660   | 5849   | 6964   | 4177   | 5159   | 6070    | 1689    | 2812    | 3459    | 3174    | 7076    | 1562    | 3001    | 2823    |
| 16    | GC       | D-Mannose                      | 6542   | 2219   | 9011   | 4482   | 4828   | 1110   | 4466   | 3555   | 2759   | 3439    | 9211    | 6762    | 4575    | 5979    | 3962    | 9252    | 6294    | 7853    |
| 17    | GC       | Docosaehaenoic acid            | 4511   | 4356   | 5176   | 3167   | 2644   | 2949   | 3556   | 3086   | 2445   | 2718    | 2386    | 2686    | 1909    | 1692    | 2796    | 1159    | 1580    | 1403    |
| 18    | GC       | Dodecanoic acid                | 73361  | 88152  | 108703 | 48166  | 72097  | 82096  | 93322  | 67213  | 88035  | 45156   | 14210   | 16273   | 26056   | 14916   | 41644   | 19447   | 18331   | 15771   |
| 19    | GC       | D-Threitol                     | 3678   | 3061   | 2908   | 2349   | 2787   | 2163   | 3440   | 2314   | 2367   | 4189    | 3822    | 3531    | 4262    | 2672    | 12083   | 2182    | 2947    | 2940    |
| 20    | GC       | D-Xylose                       | 38890  | 48278  | 26687  | 47918  | 36927  | 61060  | 68584  | 66834  | 48013  | 27659   | 91509   | 70850   | 30289   | 50375   | 35427   | 44583   | 40446   | 43019   |
| 21    | GC       | Elaidic acid                   | 141159 | 145492 | 186647 | 95806  | 135004 | 108463 | 146344 | 132204 | 108030 | 158301  | 105291  | 112184  | 124426  | 78749   | 165498  | 100813  | 100944  | 75433   |
| 22    | GC       | Ethanolamine                   | 38716  | 29040  | 43495  | 27613  | 28062  | 25967  | 18841  | 24043  | 26227  | 15451   | 45154   | 31996   | 30010   | 25992   | 25496   | 25998   | 25662   | 26682   |
| 23    | GC       | Fumaric acid                   | 3934   | 2503   | 4296   | 2273   | 4651   | 2532   | 4698   | 2394   | 2512   | 1998    | 4379    | 2444    | 1351    | 2843    | 1348    | 3366    | 3380    | 3016    |
| 24    | GC       | Galactonic acid                | 2866   | 2168   | 3254   | 2088   | 3234   | 2316   | 3463   | 1881   | 2191   | 2645    | 2563    | 1933    | 2111    | 1596    | 5356    | 1697    | 1588    | 1993    |
| 25    | GC       | Gluconolactone                 | 48877  | 97860  | 24188  | 118857 | 100651 | 59636  | 109957 | 119677 | 50840  | 45121   | 92418   | 183593  | 63416   | 197285  | 130254  | 57009   | 105075  | 143360  |
| 26    | GC       | Glutaric acid                  | 916    | 1037   | 1513   | 787    | 930    | 1297   | 1787   | 599    | 1138   | 1118    | 1041    | 819     | 932     | 669     | 842     | 561     | 521     | 776     |
| 27    | GC       | Glyceric acid                  | 1665   | 1222   | 2079   | 1721   | 2300   | 2681   | 632    | 3238   | 2576   | 3385    | 3061    | 2670    | 1645    | 2536    | 4680    | 3680    | 6347    | 3196    |
| 28    | GC       | Glycerol                       | 717099 | 273617 | 954907 | 637942 | 431168 | 367655 | 406610 | 552668 | 786686 | 469277  | 604310  | 642016  | 386474  | 475418  | 496313  | 595043  | 438762  | 570216  |
| 29    | GC       | Glycerol 3-phosphate           | 22752  | 20818  | 21720  | 15232  | 11396  | 13505  | 15701  | 12523  | 11348  | 10927   | 24755   | 21908   | 9993    | 15298   | 10921   | 13147   | 12249   | 13774   |
| 30    | GC       | Glycine                        | 323552 | 244738 | 466608 | 231518 | 312372 | 254008 | 400314 | 272972 | 260594 | 252353  | 621874  | 623826  | 249548  | 444420  | 257328  | 429801  | 408689  | 488624  |
| 31    | GC       | Glycolic acid                  | 58428  | 51555  | 61991  | 42214  | 47926  | 52941  | 82722  | 68821  | 47908  | 18131   | 69015   | 55382   | 16687   | 57842   | 16416   | 49305   | 75772   | 71970   |
| 32    | GC       | Heptadecanoic acid             | 685536 | 436044 | 734515 | 553263 | 786220 | 578292 | 707393 | 552313 | 581883 | 663640  | 723325  | 646613  | 594815  | 646135  | 515933  | 758007  | 551102  | 596642  |
| 33    | GC       | Isocitric acid                 | 35971  | 164796 | 142175 | 150431 | 106070 | 125424 | 175989 | 112316 | 151977 | 89539   | 118260  | 142631  | 78468   | 100621  | 61532   | 71510   | 96673   | 166492  |
| 34    | GC       | Ketoleucine                    | 880    | 725    | 1587   | 1387   | 1255   | 1467   | 1751   | 1398   | 1748   | 1060    | 827     | 773     | 587     | 397     | 807     | 382     | 1073    | 589     |
| 35    | GC       | L-Alanine                      | 268145 | 160447 | 222814 | 200076 | 234026 | 200648 | 106262 | 212006 | 212190 | 201348  | 261810  | 275968  | 225541  | 324861  | 257102  | 502155  | 272483  | 366441  |
| 36    | GC       | L-Alpha-aminobutyric acid      | 8798   | 8811   | 9966   | 7080   | 10795  | 10567  | 5001   | 8918   | 11155  | 7857    | 7346    | 9207    | 11504   | 9006    | 8684    | 6648    | 8864    | 9567    |

|    |    |                       |        |        |         |         |        |         |         |        |         |         |         |        |         |        |        |         |         |        |
|----|----|-----------------------|--------|--------|---------|---------|--------|---------|---------|--------|---------|---------|---------|--------|---------|--------|--------|---------|---------|--------|
| 37 | GC | L-Arabinose           | 1429   | 1779   | 2202    | 1636    | 1892   | 2897    | 3909    | 2845   | 2094    | 2055    | 3007    | 1716   | 1845    | 2770   | 3849   | 3855    | 2590    | 3786   |
| 38 | GC | L-Arabitol            | 1256   | 1980   | 3055    | 1981    | 4328   | 1482    | 8000    | 2226   | 1387    | 973     | 5628    | 5007   | 991     | 4435   | 1359   | 5579    | 3566    | 4109   |
| 39 | GC | L-Arginine            | 8095   | 7264   | 8561    | 9271    | 15223  | 9333    | 8731    | 9090   | 9631    | 7845    | 7281    | 8601   | 7674    | 9034   | 10858  | 19893   | 10330   | 10334  |
| 40 | GC | L-Aspartic acid       | 11050  | 5603   | 11988   | 7026    | 8445   | 7341    | 9674    | 6445   | 7303    | 12909   | 17899   | 13036  | 7693    | 11255  | 8840   | 11105   | 9406    | 13318  |
| 41 | GC | L-Glutamic acid       | 5549   | 3324   | 6801    | 3281    | 4857   | 3420    | 5576    | 4013   | 3327    | 4445    | 8161    | 7159   | 3168    | 5325   | 3732   | 7762    | 5626    | 7109   |
| 42 | GC | L-Glutamine           | 248241 | 279432 | 92017   | 294578  | 242263 | 271738  | 187328  | 283369 | 252521  | 144561  | 132938  | 132510 | 194512  | 339132 | 245070 | 278499  | 304614  | 364817 |
| 43 | GC | Linoleic acid         | 43806  | 47243  | 56438   | 24092   | 26333  | 36828   | 35027   | 27964  | 31682   | 17952   | 13039   | 16130  | 10994   | 10531  | 20506  | 10087   | 11709   | 9194   |
| 44 | GC | L-Lactic acid         | 340041 | 584671 | 1452330 | 2043675 | 416756 | 1427266 | 1024431 | 809976 | 1383026 | 1770471 | 1514890 | 703146 | 1745565 | 365232 | 460199 | 1772718 | 1148608 | 226972 |
| 45 | GC | L-Leucine             | 103081 | 96359  | 142182  | 119017  | 140593 | 153535  | 102933  | 119723 | 131770  | 221795  | 74159   | 62334  | 130909  | 50554  | 112639 | 61514   | 94917   | 73903  |
| 46 | GC | L-Lysine              | 139063 | 93828  | 162958  | 135158  | 127193 | 122404  | 146361  | 114510 | 124490  | 133267  | 199072  | 239120 | 110856  | 160855 | 131916 | 169203  | 145588  | 140568 |
| 47 | GC | L-Methionine          | 22571  | 18527  | 28398   | 19811   | 19670  | 21840   | 24354   | 21774  | 19206   | 19850   | 28251   | 43304  | 16327   | 20269  | 19944  | 26331   | 21498   | 20912  |
| 48 | GC | L-Phenylalanine       | 28181  | 25934  | 44670   | 29451   | 32695  | 33280   | 39571   | 31774  | 31965   | 50587   | 34903   | 46500  | 44889   | 19072  | 50092  | 28374   | 32729   | 26321  |
| 49 | GC | L-Pipecolic acid      | 9722   | 7667   | 2462    | 7433    | 8286   | 7928    | 822     | 7402   | 8836    | 4780    | 1458    | 549    | 6784    | 4868   | 7754   | 6104    | 4376    | 5270   |
| 50 | GC | L-Proline             | 122563 | 98637  | 112359  | 105195  | 96464  | 103362  | 34018   | 100465 | 105152  | 105960  | 97995   | 83172  | 88519   | 109759 | 124187 | 184211  | 120835  | 128375 |
| 51 | GC | L-Serine              | 63084  | 49449  | 68056   | 51396   | 53505  | 56455   | 47658   | 55148  | 53291   | 68433   | 113423  | 100783 | 64678   | 89275  | 70214  | 92522   | 73005   | 77602  |
| 52 | GC | L-Sorbose             | 81335  | 186593 | 37110   | 206703  | 170928 | 104937  | 193328  | 203763 | 79016   | 74647   | 220575  | 282045 | 111304  | 360136 | 246650 | 136711  | 207515  | 370894 |
| 53 | GC | L-Threonine           | 64569  | 53001  | 76597   | 57691   | 56526  | 62589   | 61063   | 63100  | 66570   | 104441  | 83529   | 89354  | 90533   | 64546  | 111701 | 77564   | 73671   | 68883  |
| 54 | GC | L-Tryptophan          | 77624  | 61478  | 90601   | 106015  | 67645  | 94731   | 85468   | 104245 | 92467   | 61801   | 139827  | 107617 | 67166   | 86867  | 58477  | 86468   | 121400  | 115852 |
| 55 | GC | L-Tyrosine            | 58091  | 37011  | 53733   | 42881   | 44014  | 50732   | 56500   | 50493  | 50960   | 55090   | 88181   | 100352 | 40570   | 49168  | 59476  | 67884   | 46854   | 52191  |
| 56 | GC | L-Valine              | 199215 | 171211 | 229346  | 212199  | 255575 | 276871  | 145047  | 237613 | 241684  | 346880  | 128799  | 122746 | 244592  | 101050 | 390443 | 156858  | 190371  | 161888 |
| 57 | GC | Maleic acid           | 8228   | 8394   | 8587    | 6277    | 6708   | 8072    | 6953    | 2503   | 7566    | 7949    | 4370    | 4509   | 6358    | 4007   | 8999   | 2613    | 4064    | 5022   |
| 58 | GC | Malic acid            | 32321  | 23802  | 42119   | 24222   | 21088  | 26471   | 29971   | 20550  | 25327   | 18380   | 41333   | 24292  | 13369   | 28851  | 13860  | 26030   | 31233   | 29452  |
| 59 | GC | Methylmalonic acid    | 2049   | 2174   | 1938    | 1553    | 1493   | 1972    | 2285    | 1923   | 2373    | 2038    | 1521    | 1069   | 1829    | 1353   | 4111   | 1189    | 1276    | 1024   |
| 60 | GC | MG(18:0(9Z)/0:0/0:0)  | 1341   | 1268   | 2099    | 1350    | 1487   | 2216    | 2192    | 1799   | 1763    | 1478    | 1056    | 1758   | 1835    | 1423   | 956    | 1184    | 1063    | 1068   |
| 61 | GC | Myristic acid         | 94501  | 103690 | 134793  | 60981   | 79573  | 95027   | 102907  | 76140  | 93741   | 75018   | 20690   | 22240  | 45175   | 20761  | 79137  | 18172   | 22470   | 27500  |
| 62 | GC | Myristoleic acid      | 4736   | 4812   | 6335    | 3147    | 3766   | 4136    | 3013    | 2834   | 3934    | 4136    | 1618    | 1386   | 2835    | 1801   | 5016   | 1087    | 1614    | 2249   |
| 63 | GC | Nonadecanoic acid     | 1576   | 1583   | 1967    | 1160    | 1835   | 1333    | 2123    | 1574   | 1376    | 1222    | 1585    | 1242   | 1422    | 1255   | 1574   | 1177    | 1405    | 1377   |
| 64 | GC | Oleic acid            | 19652  | 27426  | 23961   | 12201   | 14545  | 17570   | 17782   | 19677  | 19225   | 17307   | 10993   | 10020  | 15127   | 6736   | 18252  | 10242   | 10449   | 9944   |
| 65 | GC | O-Phosphoethanolamine | 4060   | 3623   | 6864    | 4239    | 7067   | 4083    | 6216    | 3874   | 4614    | 8628    | 6907    | 9031   | 6268    | 5212   | 6159   | 3853    | 4846    | 5836   |
| 66 | GC | Oxalic acid           | 11153  | 13755  | 13190   | 15432   | 17519  | 19184   | 20675   | 20292  | 20999   | 29432   | 24251   | 15285  | 23461   | 21874  | 32955  | 21089   | 27305   | 20683  |
| 67 | GC | Oxoglutaric acid      | 8369   | 7159   | 7397    | 6915    | 1823   | 7425    | 4225    | 5388   | 7768    | 4882    | 7487    | 2624   | 3604    | 5778   | 3709   | 2083    | 4869    | 5745   |
| 68 | GC | Palmitic acid         | 655406 | 538480 | 555881  | 537811  | 619688 | 673801  | 633331  | 626269 | 636727  | 634980  | 370667  | 400918 | 477909  | 310468 | 676934 | 290127  | 377236  | 320054 |
| 69 | GC | Palmitoleic acid      | 136203 | 141622 | 158149  | 87177   | 87536  | 113854  | 98558   | 81463  | 104991  | 118352  | 31823   | 37163  | 52995   | 34680  | 105707 | 25871   | 32434   | 45052  |
| 70 | GC | Pantothenic acid      | 879    | 855    | 1047    | 333     | 809    | 832     | 967     | 350    | 784     | 1735    | 1422    | 1420   | 1176    | 565    | 2952   | 1077    | 638     | 546    |
| 71 | GC | Pelargonic acid       | 3340   | 2911   | 6173    | 4157    | 4570   | 4542    | 6236    | 7336   | 2092    | 3305    | 4926    | 7171   | 6258    | 4634   | 3637   | 3330    | 5300    | 2687   |
| 72 | GC | Petroselinic acid     | 268293 | 329105 | 336397  | 181246  | 213074 | 281766  | 260207  | 223456 | 230470  | 257103  | 102702  | 123124 | 123448  | 96792  | 227333 | 86854   | 116299  | 113068 |
| 73 | GC | Phosphoric acid       | 425679 | 451165 | 530501  | 500915  | 590664 | 521109  | 576876  | 477133 | 604620  | 33088   | 518234  | 531686 | 486577  | 547291 | 63425  | 655737  | 629228  | 637862 |
| 74 | GC | Pyroglutamic acid     | 269525 | 230457 | 423273  | 228983  | 203535 | 239268  | 310631  | 224288 | 219858  | 270552  | 446801  | 472485 | 239004  | 310088 | 251246 | 251743  | 264111  | 290392 |
| 75 | GC | Pyruvic acid          | 44121  | 36161  | 61923   | 46638   | 43684  | 43188   | 62383   | 56975  | 45531   | 26577   | 53957   | 57880  | 21391   | 41804  | 14755  | 36352   | 27738   | 45406  |
| 76 | GC | Rhamnose              | 9853   | 10246  | 10494   | 8886    | 7656   | 10538   | 11028   | 7272   | 8323    | 13842   | 10714   | 13331  | 13067   | 8441   | 28985  | 7243    | 9027    | 8908   |

|     |    |             |         |        |         |        |        |         |        |        |         |         |        |        |        |        |        |         |        |        |
|-----|----|-------------|---------|--------|---------|--------|--------|---------|--------|--------|---------|---------|--------|--------|--------|--------|--------|---------|--------|--------|
| 77  | GC | Sorbitol    | 4799    | 3410   | 4336    | 2769   | 2298   | 3716    | 4217   | 2526   | 3075    | 3243    | 1072   | 3617   | 3013   | 4304   | 671    | 1974    | 4105   | 5451   |
| 78  | GC | Taurine     | 427852  | 244913 | 384070  | 242680 | 22717  | 245094  | 132881 | 13016  | 93227   | 446665  | 382662 | 277899 | 258628 | 272284 | 432428 | 5264    | 35283  | 106231 |
| 79  | GC | Uracil      | 2700    | 1462   | 2825    | 2330   | 2582   | 1805    | 2694   | 1695   | 2139    | 2533    | 3210   | 3426   | 2580   | 2303   | 3599   | 2642    | 2612   | 3604   |
| 80  | GC | Urea        | 131541  | 158824 | 122651  | 127698 | 10321  | 164126  | 195439 | 190195 | 192394  | 147973  | 172544 | 138206 | 132516 | 95451  | 134371 | 223776  | 117834 | 192198 |
| 81  | GC | Uric acid   | 13791   | 11431  | 7463    | 9144   | 8705   | 10423   | 10930  | 9282   | 7248    | 9180    | 23455  | 12003  | 10914  | 10701  | 8930   | 10918   | 16933  | 11307  |
| 82  | BA | CA          | 8.47    | 19.62  | 13.58   | 12.62  | 2.98   | 41.69   | 7.71   | 9.56   | 34.80   | 3.23    | 3.31   | 30.34  | 2.01   | 7.39   | 1.17   | 7.91    | 7.48   | 10.05  |
| 83  | BA | aMCA        | 41.97   | 28.43  | 73.59   | 30.70  | 1.50   | 114.49  | 7.74   | 28.48  | 58.02   | 7.46    | 6.94   | 17.38  | 7.78   | 2.80   | 3.89   | 5.47    | 12.60  | 43.54  |
| 84  | BA | bMCA        | 88.76   | 94.32  | 146.24  | 102.77 | 41.89  | 230.17  | 52.66  | 115.97 | 274.58  | 25.78   | 33.70  | 54.47  | 17.61  | 38.93  | 31.90  | 29.68   | 38.10  | 69.07  |
| 85  | BA | wMCA        | 65.37   | 67.53  | 66.87   | 65.49  | 54.24  | 72.93   | 63.67  | 64.08  | 70.96   | 66.45   | 64.26  | 65.84  | 63.64  | 64.84  | 64.92  | 64.49   | 67.27  | 65.53  |
| 86  | BA | DCA         | 33.89   | 83.84  | 77.36   | 37.86  | 207.13 | 33.96   | 3.80   | 15.34  | 38.23   | 6.73    | 6.54   | 13.91  | 1.13   | 8.73   | 3.72   | 3.37    | 4.59   | 14.77  |
| 87  | BA | LCA         | 568.93  | 242.36 | 1719.38 | 267.31 | 377.11 | 1471.47 | 643.39 | 389.39 | 411.49  | 653.96  | 643.98 | 494.50 | 217.94 | 909.71 | 320.62 | 1884.05 | 962.59 | 813.54 |
| 88  | BA | UDCA        | 11.07   | 32.23  | 21.31   | 5.64   | 2.24   | 16.39   | 2.38   | 5.17   | 20.11   | 3.10    | 2.75   | 3.97   | 1.27   | 0.39   | 1.29   | 2.02    | 1.36   | 4.20   |
| 89  | BA | HDCA        | 41.28   | 266.93 | 241.04  | 49.57  | 89.92  | 393.41  | 22.88  | 55.83  | 318.03  | 12.78   | 18.98  | 46.88  | 5.83   | 17.81  | 6.98   | 9.79    | 3.44   | 21.72  |
| 90  | BA | DHCA        | 49.44   | 43.22  | 156.22  | 42.73  | 49.44  | 44.91   | 49.48  | 44.29  | 40.94   | 62.75   | 108.43 | 82.37  | 39.22  | 139.90 | 85.13  | 231.96  | 77.77  | 125.63 |
| 91  | BA | 7_ketoDCA   | 185.00  | 109.61 | 440.01  | 52.03  | 57.77  | 312.72  | 134.83 | 58.41  | 85.26   | 288.15  | 117.05 | 110.91 | 74.10  | 143.40 | 167.94 | 678.20  | 380.83 | 497.91 |
| 92  | BA | 12_ketoCDCA | 34.19   | 24.42  | 34.53   | 53.20  | 21.19  | 21.07   | 11.86  | 27.36  | 30.14   | 0.61    | 0.15   | 0.64   | 0.48   | 0.08   | 0.68   | 8.78    | 1.64   | 0.51   |
| 93  | BA | dehydro_LCA | 0.53    | 0.09   | 0.32    | 0.10   | 1.02   | 0.68    | 1.03   | 0.60   | 0.06    | 1.45    | 0.74   | 0.33   | 0.25   | 1.69   | 0.23   | 0.10    | 0.27   | 1.57   |
| 94  | BA | 23_nor_DCA  | 7.33    | 21.14  | 25.86   | 6.42   | 21.46  | 26.45   | 7.93   | 3.69   | 2.35    | 14.63   | 8.92   | 31.47  | 13.41  | 7.22   | 9.23   | 9.65    | 7.72   | 2.66   |
| 95  | BA | 6_ketoLCA   | 11.97   | 16.31  | 20.80   | 11.56  | 8.61   | 19.35   | 11.53  | 21.25  | 22.96   | 11.08   | 10.35  | 3.46   | 2.54   | 23.84  | 4.78   | 11.78   | 17.98  | 16.66  |
| 96  | BA | 7_ketoLCA   | 110.20  | 125.61 | 125.84  | 117.23 | 109.65 | 110.59  | 106.16 | 116.34 | 105.42  | 99.89   | 94.00  | 114.48 | 106.57 | 98.26  | 104.85 | 100.86  | 111.23 | 124.14 |
| 97  | BA | 12_ketoLCA  | 0.36    | 0.25   | 2.27    | 0.08   | 0.00   | 0.02    | 0.01   | 0.00   | 0.00    | 0.00    | 0.14   | 0.50   | 0.00   | 0.64   | 0.00   | 0.00    | 0.00   | 0.00   |
| 98  | BA | apo_CA      | 0.25    | 1.56   | 6.52    | 0.12   | 0.10   | 6.35    | 0.84   | 0.09   | 5.16    | 0.33    | 0.76   | 1.35   | 0.19   | 0.09   | 0.18   | 0.08    | 1.70   | 0.46   |
| 99  | BA | muroCA      | 1.46    | 7.68   | 0.38    | 1.90   | 4.92   | 1.91    | 3.29   | 4.59   | 1.48    | 3.28    | 2.52   | 8.10   | 3.84   | 2.52   | 5.02   | 9.74    | 7.13   | 13.86  |
| 100 | BA | beta-UDCA   | 2.81    | 3.81   | 2.76    | 0.20   | 0.23   | 2.03    | 1.06   | 0.44   | 2.47    | 0.91    | 0.05   | 2.55   | 0.19   | 0.20   | 0.34   | 1.44    | 2.62   | 2.22   |
| 101 | BA | 3-ketoCA    | 123.18  | 156.16 | 186.03  | 120.48 | 124.98 | 197.27  | 109.21 | 127.80 | 175.51  | 104.69  | 104.68 | 123.09 | 102.81 | 112.96 | 104.31 | 105.18  | 104.30 | 113.05 |
| 102 | BA | ACA         | 150.87  | 334.85 | 359.52  | 103.68 | 79.03  | 287.47  | 85.56  | 88.88  | 221.46  | 50.98   | 109.17 | 83.51  | 20.36  | 200.86 | 46.72  | 136.77  | 136.39 | 258.12 |
| 103 | BA | TCA         | 424.15  | 135.24 | 633.48  | 166.07 | 209.31 | 776.42  | 435.98 | 139.82 | 307.77  | 1033.70 | 562.27 | 343.08 | 150.00 | 535.03 | 276.71 | 745.43  | 486.95 | 407.74 |
| 104 | BA | TCDCA       | 4.03    | 2.17   | 2.53    | 2.58   | 2.61   | 3.53    | 3.45   | 3.37   | 2.34    | 3.94    | 3.09   | 2.49   | 2.58   | 2.95   | 3.04   | 3.33    | 3.53   | 2.68   |
| 105 | BA | TaMCA       | 115.60  | 34.51  | 153.46  | 72.98  | 2.52   | 45.39   | 7.22   | 7.86   | 14.57   | 24.06   | 17.28  | 20.73  | 6.00   | 19.71  | 16.40  | 34.46   | 16.09  | 59.91  |
| 106 | BA | TbMCA       | 1253.30 | 293.88 | 1495.84 | 843.63 | 479.46 | 1274.04 | 457.87 | 541.99 | 1006.92 | 637.20  | 349.63 | 458.71 | 182.62 | 525.89 | 263.15 | 384.99  | 473.08 | 758.36 |
| 107 | BA | TwMCA       | 83.42   | 63.94  | 204.05  | 42.03  | 60.29  | 131.05  | 65.43  | 52.66  | 90.88   | 79.79   | 69.81  | 75.43  | 66.34  | 67.18  | 83.20  | 103.37  | 63.52  | 89.91  |
| 108 | BA | TDCA        | 8.45    | 6.17   | 11.56   | 9.50   | 8.67   | 9.58    | 7.95   | 8.19   | 10.96   | 7.48    | 8.70   | 7.74   | 10.35  | 11.41  | 7.52   | 8.35    | 6.41   | 11.20  |
| 109 | BA | TLCA        | 0.21    | 1.45   | 0.25    | 0.22   | 0.21   | 0.91    | 0.39   | 0.25   | 0.64    | 0.49    | 0.24   | 0.27   | 1.05   | 0.68   | 0.23   | 0.55    | 0.86   | 1.71   |
| 110 | BA | TUDCA       | 117.72  | 216.82 | 238.66  | 128.37 | 142.80 | 582.12  | 130.61 | 148.06 | 549.06  | 78.34   | 81.45  | 134.32 | 12.31  | 67.61  | 25.40  | 59.41   | 59.62  | 103.45 |
| 111 | BA | THCA        | 132.44  | 21.44  | 222.62  | 64.89  | 37.16  | 203.08  | 31.85  | 39.37  | 103.59  | 109.32  | 215.04 | 62.03  | 29.80  | 111.39 | 12.62  | 248.33  | 122.96 | 177.02 |
| 112 | BA | THDCA       | 11.24   | 11.18  | 11.27   | 11.29  | 11.16  | 11.55   | 11.21  | 11.32  | 11.46   | 10.32   | 10.09  | 11.20  | 10.11  | 9.90   | 10.31  | 10.48   | 10.10  | 9.88   |
| 113 | BA | GCDCA       | 543.82  | 419.78 | 584.41  | 298.65 | 67.32  | 1290.96 | 207.13 | 304.58 | 633.09  | 20.83   | 0.41   | 315.73 | 8.60   | 124.96 | 2.13   | 38.68   | 173.43 | 376.97 |
| 114 | BA | GDCA        | 0.15    | 0.33   | 0.28    | 0.42   | 0.60   | 0.21    | 0.91   | 0.05   | 0.15    | 0.36    | 0.23   | 0.25   | 0.19   | 0.19   | 3.78   | 0.66    | 0.67   | 0.74   |
| 115 | BA | GLCA        | 23.60   | 0.05   | 7.77    | 18.35  | 1.09   | 61.14   | 3.63   | 11.79  | 27.16   | 1.32    | 0.04   | 0.29   | 0.89   | 30.95  | 0.69   | 0.45    | 0.68   | 2.07   |
| 116 | BA | GUDCA       | 163.70  | 145.07 | 156.91  | 163.06 | 140.07 | 188.79  | 153.36 | 162.69 | 199.54  | 148.82  | 156.86 | 149.15 | 139.16 | 154.50 | 140.26 | 145.19  | 141.65 | 151.37 |
