# Supplementary material
Source: PubMed Central journal article supplement (PMC9292403)
Supplement: FSB2-32-4878-s003.pdf [file FSB2-32-4878-s003.pdf]

Table S2. Raw data of metabolomics-HFD groups

| Index | Platform | Name                           | H01pre | H02pre  | H03pre | H04pre | H05pre | H06pre | H07pre | H08pre | H09pre | H01post | H02post | H03post | H04post | H05post | H06post | H07post | H08post | H09post | H10post | H11post |
|-------|----------|--------------------------------|--------|---------|--------|--------|--------|--------|--------|--------|--------|---------|---------|---------|---------|---------|---------|---------|---------|---------|---------|---------|
| 1     | GC       | 2-Hydroxy-3-methylbutyric acid | 43608  | 51423   | 43445  | 43633  | 35470  | 43964  | 41816  | 46430  | 53275  | 27134   | 22306   | 26340   | 20086   | 28967   | 28883   | 23228   | 24126   | 44992   | 27152   | 24119   |
| 2     | GC       | 2-Hydroxybutyric acid          | 37964  | 33656   | 36151  | 35451  | 25869  | 43635  | 29022  | 51610  | 48214  | 11783   | 12330   | 8991    | 5716    | 13243   | 12617   | 8114    | 14859   | 52494   | 8948    | 8437    |
| 3     | GC       | 2-Hydroxypyridine              | 33584  | 57598   | 36645  | 36804  | 34162  | 43242  | 30997  | 37259  | 37690  | 26246   | 42666   | 38289   | 36350   | 37308   | 88508   | 37328   | 38933   | 44493   | 40833   | 34351   |
| 4     | GC       | 3-Methyl-2-oxovaleric acid     | 10878  | 9036    | 9630   | 6427   | 5194   | 11101  | 11581  | 13148  | 13793  | 10763   | 13406   | 7136    | 8070    | 11244   | 9730    | 7694    | 10381   | 15067   | 9968    | 11416   |
| 5     | GC       | Acetylglycine                  | 17231  | 13023   | 17225  | 15375  | 13799  | 15804  | 15723  | 19760  | 15318  | 4988    | 5443    | 4799    | 5662    | 7790    | 3434    | 3164    | 7030    | 7695    | 6839    | 4309    |
| 6     | GC       | Alpha-ketoisovaleric acid      | 826    | 593     | 620    | 636    | 711    | 635    | 388    | 869    | 982    | 582     | 716     | 644     | 411     | 502     | 550     | 576     | 585     | 925     | 522     | 732     |
| 7     | GC       | Aminomalonic acid              | 4873   | 9686    | 8892   | 5247   | 8237   | 7241   | 3317   | 9213   | 8032   | 7074    | 7647    | 10781   | 18290   | 9675    | 15062   | 11442   | 17647   | 9247    | 9756    | 6681    |
| 8     | GC       | Arachidonic acid               | 8304   | 8476    | 6834   | 3942   | 4281   | 7691   | 6720   | 7796   | 7846   | 4811    | 3449    | 3231    | 5055    | 3883    | 5858    | 5918    | 6948    | 5084    | 5802    | 4716    |
| 9     | GC       | Benzoic acid                   | 2927   | 1977    | 5836   | 4927   | 2482   | 2679   | 2674   | 3380   | 3366   | 1537    | 3410    | 4577    | 2630    | 2525    | 2486    | 2750    | 3685    | 2504    | 2420    | 2908    |
| 10    | GC       | Beta-Alanine                   | 2543   | 2631    | 1437   | 1987   | 1585   | 2397   | 2116   | 1288   | 1157   | 1351    | 1270    | 1170    | 782     | 1641    | 2051    | 1108    | 1102    | 658     | 1107    | 1111    |
| 11    | GC       | Cholesterol                    | 191335 | 195946  | 163742 | 153070 | 163729 | 207250 | 173802 | 193197 | 207532 | 224564  | 199706  | 184769  | 150996  | 146817  | 228132  | 175196  | 165659  | 190850  | 181807  | 206425  |
| 12    | GC       | cis-4-Hydroxy-L-proline        | 11714  | 15862   | 11565  | 14142  | 16101  | 14928  | 13123  | 9663   | 11675  | 12605   | 11989   | 7128    | 19459   | 14037   | 3186    | 16714   | 16505   | 10836   | 12212   | 21437   |
| 13    | GC       | Citrulline                     | 6302   | 7648    | 4810   | 6418   | 7821   | 7090   | 6121   | 6704   | 5288   | 5790    | 5801    | 6186    | 5582    | 4770    | 6524    | 5624    | 5119    | 6543    | 5130    | 6425    |
| 14    | GC       | Creatinine                     | 270242 | 199059  | 162302 | 209997 | 192959 | 188957 | 224549 | 192302 | 190475 | 134522  | 168853  | 92374   | 133689  | 88230   | 90615   | 66664   | 132886  | 225497  | 82352   | 115845  |
| 15    | GC       | D-Galactose                    | 6143   | 5596    | 4965   | 5174   | 4113   | 6276   | 8554   | 5301   | 3697   | 3021    | 2304    | 1963    | 3053    | 2776    | 2342    | 2167    | 2001    | 2404    | 1697    | 2137    |
| 16    | GC       | D-Mannose                      | 4470   | 3694    | 9019   | 6702   | 2063   | 5657   | 6722   | 4944   | 5098   | 6639    | 4743    | 9391    | 8155    | 8093    | 7152    | 5328    | 11281   | 2965    | 7070    | 7633    |
| 17    | GC       | Docosahexaenoic acid           | 4268   | 4699    | 3413   | 2389   | 2330   | 3885   | 3003   | 3086   | 3105   | 1936    | 2956    | 1364    | 1684    | 1392    | 2038    | 1860    | 2092    | 2625    | 2261    | 1591    |
| 18    | GC       | Dodecanoic acid                | 353259 | 483506  | 435164 | 283299 | 370293 | 523789 | 349974 | 397089 | 461422 | 16604   | 34949   | 17563   | 34633   | 46550   | 28296   | 42571   | 44813   | 49976   | 65492   | 27752   |
| 19    | GC       | D-Threitol                     | 3431   | 3389    | 2557   | 2635   | 2376   | 2973   | 5933   | 2828   | 2567   | 3246    | 2767    | 3300    | 2057    | 2215    | 6981    | 3499    | 3232    | 1805    | 3201    | 3026    |
| 20    | GC       | D-Xylose                       | 45266  | 54199   | 49590  | 14711  | 41419  | 33129  | 39215  | 41410  | 61157  | 40699   | 44855   | 56295   | 51350   | 63363   | 59173   | 54923   | 44509   | 28356   | 26415   | 35922   |
| 21    | GC       | Elaidic acid                   | 182333 | 191087  | 206674 | 131008 | 126774 | 185196 | 155924 | 156955 | 162620 | 120519  | 140409  | 71198   | 116584  | 115414  | 165011  | 123034  | 110627  | 106290  | 109069  | 103847  |
| 22    | GC       | Ethanolamine                   | 33575  | 26254   | 25616  | 27266  | 22831  | 30041  | 27924  | 23534  | 21960  | 29783   | 23900   | 25210   | 20764   | 24124   | 29128   | 21853   | 22355   | 25403   | 18498   | 21920   |
| 23    | GC       | Fumaric acid                   | 5153   | 3850    | 3023   | 3904   | 2344   | 5380   | 4459   | 2717   | 3109   | 3749    | 2746    | 2938    | 1845    | 2174    | 3859    | 2842    | 3067    | 1888    | 2018    | 3434    |
| 24    | GC       | Galactonic acid                | 2586   | 3028    | 2482   | 3227   | 2180   | 3285   | 2756   | 2827   | 1150   | 2260    | 2642    | 1355    | 1552    | 2164    | 1903    | 1435    | 829     | 1911    | 1732    | 1543    |
| 25    | GC       | Gluconolactone                 | 82652  | 16956   | 141776 | 20787  | 47528  | 159655 | 76883  | 33439  | 48674  | 71194   | 102108  | 37105   | 197937  | 51014   | 32515   | 35743   | 44237   | 123500  | 36867   | 75948   |
| 26    | GC       | Glutaric acid                  | 1359   | 1431    | 1018   | 1394   | 928    | 988    | 1385   | 1166   | 1179   | 800     | 1034    | 995     | 417     | 557     | 813     | 756     | 969     | 627     | 682     | 772     |
| 27    | GC       | Glyceric acid                  | 1790   | 1979    | 1822   | 2169   | 1797   | 2643   | 4032   | 3850   | 3745   | 978     | 1623    | 1836    | 2023    | 1968    | 4669    | 2881    | 2633    | 2449    | 3095    | 5712    |
| 28    | GC       | Glycerol                       | 731945 | 1021545 | 823275 | 501283 | 579420 | 743272 | 820681 | 441978 | 725121 | 574775  | 880272  | 88716   | 469045  | 666398  | 736866  | 568410  | 629288  | 420768  | 596141  | 648349  |
| 29    | GC       | Glycerol 3-phosphate           | 21591  | 21407   | 15201  | 13669  | 12455  | 13280  | 10497  | 11972  | 11510  | 14444   | 12480   | 12449   | 12532   | 11174   | 16664   | 13345   | 13288   | 11349   | 11432   | 13547   |
| 30    | GC       | Glycine                        | 386331 | 380897  | 310482 | 386243 | 382518 | 484615 | 320237 | 434067 | 308240 | 459692  | 376177  | 425760  | 448709  | 441890  | 606588  | 406321  | 463913  | 288502  | 446274  | 541904  |
| 31    | GC       | Glycolic acid                  | 46990  | 70687   | 57120  | 60877  | 73985  | 56478  | 96994  | 60346  | 53964  | 44945   | 62713   | 64602   | 56542   | 66632   | 75527   | 71082   | 70889   | 27862   | 68856   | 56019   |
| 32    | GC       | Heptadecanoic acid             | 398816 | 408686  | 583370 | 592668 | 671352 | 732684 | 619491 | 557094 | 596491 | 548595  | 572806  | 237963  | 526079  | 691605  | 724418  | 523185  | 606578  | 512321  | 631877  | 570584  |
| 33    | GC       | Isocitric acid                 | 158867 | 258011  | 118218 | 120898 | 121409 | 129943 | 181200 | 142943 | 199134 | 80506   | 131820  | 173265  | 68454   | 109011  | 127376  | 128424  | 167232  | 106273  | 141490  | 146521  |
| 34    | GC       | Ketoleucine                    | 1009   | 691     | 811    | 941    | 840    | 1200   | 1208   | 1584   | 1443   | 1182    | 610     | 809     | 575     | 1015    | 623     | 787     | 987     | 1255    | 1102    | 1149    |
| 35    | GC       | L-Alanine                      | 300548 | 176178  | 237769 | 254863 | 215733 | 184512 | 207432 | 235928 | 213733 | 526024  | 536649  | 358699  | 548605  | 314381  | 169463  | 419115  | 377262  | 256130  | 355352  | 346851  |
| 36    | GC       | L-Alpha-aminobutyric acid      | 13732  | 8456    | 12912  | 13075  | 13436  | 11304  | 9797   | 15846  | 13673  | 9228    | 12266   | 5695    | 7896    | 7844    | 5539    | 6567    | 12293   | 17137   | 7324    | 7719    |

|    |    |                       |        |        |         |        |        |         |        |         |         |         |        |         |         |         |        |         |         |        |        |         |
|----|----|-----------------------|--------|--------|---------|--------|--------|---------|--------|---------|---------|---------|--------|---------|---------|---------|--------|---------|---------|--------|--------|---------|
| 37 | GC | L-Arabinose           | 1593   | 1784   | 1597    | 2444   | 2208   | 2474    | 2751   | 2828    | 3343    | 1901    | 3292   | 2751    | 3089    | 2918    | 6015   | 3273    | 3292    | 2407   | 3827   | 4184    |
| 38 | GC | L-Arabitol            | 1155   | 2687   | 1528    | 2913   | 2169   | 2346    | 2251   | 2628    | 2242    | 2967    | 3391   | 5099    | 5480    | 4551    | 9594   | 6864    | 4669    | 2002   | 5769   | 5555    |
| 39 | GC | L-Arginine            | 13256  | 11361  | 10834   | 13983  | 18038  | 26169   | 22144  | 16524   | 12301   | 15925   | 14400  | 13640   | 14140   | 8653    | 11928  | 17058   | 14699   | 14164  | 12524  | 16151   |
| 40 | GC | L-Aspartic acid       | 13300  | 12775  | 8783    | 12372  | 10022  | 8762    | 7167   | 6580    | 7581    | 14256   | 6540   | 9762    | 9881    | 9579    | 14452  | 10632   | 8656    | 8199   | 10006  | 11307   |
| 41 | GC | L-Glutamic acid       | 7136   | 7064   | 3905    | 5909   | 4648   | 5955    | 5183   | 4315    | 4116    | 5882    | 3884   | 4717    | 4250    | 4455    | 8754   | 7204    | 5638    | 4232   | 4735   | 6843    |
| 42 | GC | L-Glutamine           | 313744 | 311009 | 272593  | 320961 | 408011 | 412941  | 282015 | 325508  | 303059  | 228229  | 288122 | 397431  | 322310  | 296103  | 411660 | 350529  | 396492  | 487458 | 364591 | 493137  |
| 43 | GC | Linoleic acid         | 20343  | 33240  | 28605   | 28332  | 18787  | 28928   | 22689  | 18924   | 25440   | 11596   | 6203   | 6098    | 12607   | 15718   | 8414   | 15370   | 14087   | 6146   | 14339  | 11087   |
| 44 | GC | L-Lactic acid         | 678901 | 776865 | 1274137 | 549425 | 531737 | 1592968 | 944681 | 1437833 | 1435691 | 1159218 | 443984 | 1704619 | 2064733 | 1279830 | 328764 | 1445135 | 1185246 | 456923 | 741091 | 2091886 |
| 45 | GC | L-Leucine             | 131105 | 105451 | 101633  | 113364 | 117874 | 170013  | 103228 | 149755  | 134266  | 102636  | 124590 | 66782   | 98682   | 102703  | 46965  | 100284  | 95966   | 144467 | 68297  | 76954   |
| 46 | GC | L-Lysine              | 158356 | 129122 | 101115  | 132834 | 154400 | 150938  | 117218 | 127524  | 110910  | 210525  | 108537 | 170804  | 192679  | 138893  | 224822 | 181864  | 177344  | 153029 | 150674 | 199543  |
| 47 | GC | L-Methionine          | 23365  | 25097  | 19916   | 25862  | 27144  | 27996   | 24861  | 25975   | 25953   | 31161   | 26704  | 20396   | 29579   | 23524   | 21229  | 31598   | 26812   | 24731  | 24010  | 23609   |
| 48 | GC | L-Phenylalanine       | 31047  | 34778  | 25086   | 30948  | 31279  | 43045   | 29252  | 34449   | 31333   | 37352   | 29261  | 27977   | 28263   | 28910   | 29241  | 33013   | 29512   | 41044  | 24347  | 28641   |
| 49 | GC | L-Pipecolic acid      | 7803   | 5403   | 6314    | 5581   | 5951   | 7116    | 11956  | 9675    | 8429    | 7160    | 5804   | 6024    | 8332    | 5596    | 815    | 4971    | 6753    | 3880   | 6221   | 5505    |
| 50 | GC | L-Proline             | 149861 | 120573 | 109230  | 144646 | 191521 | 118658  | 130016 | 138574  | 123002  | 187356  | 117025 | 126831  | 181263  | 119048  | 66846  | 207027  | 126290  | 111787 | 123278 | 138546  |
| 51 | GC | L-Serine              | 77991  | 68384  | 57976   | 64238  | 72300  | 75461   | 57828  | 73261   | 64562   | 94625   | 70325  | 80289   | 103662  | 64983   | 71920  | 92021   | 95703   | 60693  | 80495  | 94087   |
| 52 | GC | L-Sorbose             | 145673 | 30247  | 267972  | 197345 | 86708  | 272426  | 135837 | 36289   | 86292   | 144063  | 225983 | 67036   | 351732  | 85587   | 61696  | 81796   | 106475  | 19550  | 123507 | 141195  |
| 53 | GC | L-Threonine           | 89696  | 69916  | 63136   | 73151  | 83159  | 77052   | 66749  | 81399   | 82393   | 98985   | 78503  | 76497   | 99490   | 73603   | 54920  | 98141   | 102734  | 79564  | 78190  | 76588   |
| 54 | GC | L-Tryptophan          | 74180  | 73283  | 48700   | 82033  | 67866  | 59323   | 43086  | 63768   | 71860   | 115277  | 116990 | 114883  | 102797  | 107536  | 104293 | 114370  | 114393  | 83081  | 108479 | 119799  |
| 55 | GC | L-Tyrosine            | 64755  | 53047  | 37926   | 60840  | 65217  | 59026   | 53120  | 51530   | 66953   | 76673   | 63202  | 55228   | 76166   | 57285   | 52814  | 94820   | 73712   | 40817  | 54501  | 63974   |
| 56 | GC | L-Valine              | 275315 | 161486 | 207122  | 200966 | 218091 | 257476  | 179227 | 269085  | 255805  | 232745  | 234457 | 140566  | 230548  | 217007  | 82753  | 231261  | 188484  | 146080 | 149391 | 153176  |
| 57 | GC | Maleic acid           | 9901   | 10488  | 8793    | 7578   | 7583   | 18312   | 3150   | 8857    | 9047    | 4773    | 7725   | 4504    | 4516    | 4989    | 7292   | 4088    | 1190    | 5906   | 4384   | 4617    |
| 58 | GC | Malic acid            | 50462  | 38529  | 30277   | 38783  | 23060  | 29818   | 35650  | 24781   | 28554   | 36035   | 26370  | 27407   | 19337   | 21782   | 25626  | 21407   | 32139   | 17765  | 19126  | 34642   |
| 59 | GC | Methylmalonic acid    | 2168   | 2622   | 1738    | 1625   | 1418   | 1363    | 2107   | 1757    | 2256    | 1369    | 1810   | 1594    | 1337    | 1515    | 1458   | 1407    | 1573    | 1582   | 1280   | 1439    |
| 60 | GC | MG(18:0(9Z)/0:0/0:0)  | 2244   | 3290   | 2607    | 2379   | 2234   | 2461    | 2118   | 4100    | 3389    | 1602    | 2197   | 1449    | 2179    | 899     | 1935   | 1157    | 1613    | 1716   | 1818   | 1585    |
| 61 | GC | Myristic acid         | 277060 | 336533 | 343640  | 194128 | 261657 | 354837  | 238613 | 283655  | 319740  | 23388   | 25499  | 20093   | 33622   | 66328   | 34727  | 55656   | 56906   | 57226  | 68798  | 39520   |
| 62 | GC | Myristoleic acid      | 11700  | 14263  | 12195   | 7966   | 10195  | 13721   | 8123   | 12064   | 12705   | 1784    | 1064   | 1681    | 1921    | 3635    | 2284   | 1767    | 2574    | 2947   | 3131   | 1579    |
| 63 | GC | Nonadecanoic acid     | 1469   | 1692   | 1584    | 1225   | 1324   | 1679    | 1527   | 1551    | 1538    | 1456    | 1497   | 1032    | 1506    | 1421    | 1883   | 1369    | 1513    | 1316   | 1366   | 1435    |
| 64 | GC | Oleic acid            | 15960  | 11171  | 19610   | 11070  | 10937  | 15067   | 11121  | 10168   | 23150   | 9147    | 13560  | 7087    | 9499    | 15613   | 5998   | 13233   | 11942   | 11751  | 8806   | 7750    |
| 65 | GC | O-Phosphoethanolamine | 5502   | 7870   | 2990    | 5673   | 5129   | 6703    | 3806   | 4161    | 3137    | 5466    | 3494   | 4258    | 2288    | 5671    | 9065   | 3919    | 2981    | 4882   | 3294   | 5708    |
| 66 | GC | Oxalic acid           | 9737   | 15686  | 7947    | 14885  | 14936  | 15472   | 19691  | 24134   | 22275   | 12273   | 19895  | 15028   | 19642   | 16282   | 25639  | 21545   | 23643   | 24787  | 22825  | 23458   |
| 67 | GC | Oxoglutaric acid      | 11208  | 12030  | 8545    | 4533   | 8433   | 5007    | 9577   | 8195    | 7875    | 6266    | 7254   | 8526    | 4664    | 6688    | 3827   | 5452    | 6929    | 3559   | 4320   | 6253    |
| 68 | GC | Palmitic acid         | 677966 | 630656 | 698319  | 487988 | 518070 | 704682  | 535340 | 636571  | 653110  | 384336  | 545531 | 280559  | 376835  | 522703  | 552042 | 509074  | 454267  | 441054 | 452093 | 387192  |
| 69 | GC | Palmitoleic acid      | 102156 | 113709 | 90953   | 62078  | 88957  | 104836  | 59493  | 99113   | 110084  | 32979   | 80351  | 25872   | 25977   | 82309   | 51113  | 60219   | 48898   | 55623  | 46671  | 44729   |
| 70 | GC | Pantothenic acid      | 712    | 817    | 459     | 1009   | 618    | 913     | 857    | 944     | 991     | 987     | 985    | 838     | 891     | 755     | 1182   | 824     | 731     | 825    | 753    | 871     |
| 71 | GC | Pelargonic acid       | 3260   | 2461   | 5022    | 3514   | 4921   | 4003    | 2868   | 5327    | 2574    | 3325    | 3347   | 4198    | 3968    | 4411    | 3798   | 4519    | 2431    | 2268   | 5059   | 2307    |
| 72 | GC | Petroselinic acid     | 231590 | 246831 | 231069  | 148537 | 175935 | 250707  | 179734 | 200029  | 234590  | 106589  | 158181 | 81804   | 101704  | 172151  | 179057 | 173779  | 148594  | 166784 | 137775 | 118483  |
| 73 | GC | Phosphoric acid       | 517524 | 471634 | 506284  | 608771 | 567758 | 653842  | 595458 | 654440  | 637617  | 595096  | 634933 | 514450  | 517460  | 552422  | 641085 | 633195  | 664716  | 647747 | 657140 | 689552  |
| 74 | GC | Pyroglutamic acid     | 303880 | 402400 | 234675  | 289701 | 300791 | 299552  | 252703 | 250715  | 239236  | 353461  | 223084 | 271792  | 266945  | 266096  | 466501 | 275686  | 284262  | 308041 | 252154 | 361395  |
| 75 | GC | Pyruvic acid          | 57803  | 65045  | 40719   | 52183  | 46327  | 51249   | 53269  | 44779   | 51848   | 64397   | 48636  | 60590   | 39149   | 51913   | 50156  | 47322   | 41224   | 32799  | 49210  | 51823   |
| 76 | GC | Rhamnose              | 8539   | 12148  | 8722    | 7569   | 7978   | 9592    | 10266  | 9725    | 9609    | 10436   | 9480   | 9386    | 10558   | 7501    | 13187  | 7788    | 9478    | 6595   | 8567   | 10448   |

|     |    |             |        |         |         |         |         |        |        |         |         |         |        |         |         |         |        |        |         |        |        |        |
|-----|----|-------------|--------|---------|---------|---------|---------|--------|--------|---------|---------|---------|--------|---------|---------|---------|--------|--------|---------|--------|--------|--------|
| 77  | GC | Sorbitol    | 5044   | 3188    | 2733    | 3067    | 2623    | 1785   | 3680   | 5481    | 4168    | 2650    | 3749   | 3812    | 1845    | 2591    | 2856   | 4550   | 4102    | 1504   | 3206   | 4114   |
| 78  | GC | Taurine     | 358998 | 363774  | 268951  | 301504  | 310749  | 6733   | 22913  | 92108   | 115461  | 408586  | 52420  | 190920  | 216751  | 240414  | 105087 | 21422  | 57607   | 107340 | 105384 | 120682 |
| 79  | GC | Uracil      | 3676   | 3008    | 2072    | 4429    | 2323    | 3534   | 597    | 1899    | 1919    | 3196    | 1286   | 1609    | 1487    | 1929    | 2655   | 1643   | 2098    | 3072   | 1415   | 2711   |
| 80  | GC | Urea        | 126404 | 132647  | 4031    | 126473  | 99553   | 196724 | 172783 | 94864   | 106398  | 104546  | 98437  | 174453  | 69088   | 127952  | 189252 | 126831 | 54152   | 119599 | 113097 | 138985 |
| 81  | GC | Uric acid   | 10754  | 13218   | 9073    | 6399    | 10051   | 5594   | 7248   | 7703    | 6976    | 11016   | 6404   | 11131   | 8669    | 12512   | 16876  | 9758   | 7003    | 8471   | 5405   | 7120   |
| 82  | BA | CA          | 5.33   | 11.25   | 8.28    | 59.25   | 22.49   | 17.95  | 29.10  | 97.04   | 43.43   | 47.43   | 4.93   | 1.81    | 29.14   | 23.85   | 16.44  | 14.80  | 52.56   | 1.25   | 15.98  | 41.78  |
| 83  | BA | aMCA        | 53.74  | 72.06   | 15.58   | 237.08  | 66.35   | 61.05  | 159.70 | 675.33  | 280.76  | 149.10  | 34.30  | 5.08    | 49.88   | 9.12    | 15.78  | 9.18   | 136.89  | 2.93   | 11.16  | 81.47  |
| 84  | BA | bMCA        | 122.43 | 93.49   | 41.26   | 360.69  | 185.70  | 142.04 | 101.13 | 644.34  | 302.47  | 95.40   | 72.00  | 33.74   | 106.47  | 107.01  | 119.51 | 101.51 | 777.42  | 22.80  | 84.41  | 227.54 |
| 85  | BA | wMCA        | 72.35  | 78.39   | 65.58   | 94.91   | 85.69   | 70.32  | 72.67  | 108.52  | 75.18   | 80.02   | 69.31  | 64.19   | 76.37   | 64.65   | 64.84  | 63.81  | 84.61   | 63.54  | 66.66  | 72.70  |
| 86  | BA | DCA         | 30.29  | 36.40   | 24.04   | 96.36   | 108.99  | 24.97  | 15.50  | 138.14  | 78.90   | 28.60   | 17.21  | 7.51    | 96.01   | 45.36   | 28.84  | 30.64  | 287.29  | 12.41  | 14.33  | 44.61  |
| 87  | BA | LCA         | 204.20 | 1896.11 | 1304.55 | 1252.18 | 1733.55 | 105.06 | 253.69 | 1675.00 | 2325.66 | 554.14  | 108.47 | 1188.73 | 1826.80 | 1217.54 | 155.10 | 613.23 | 1235.47 | 317.10 | 600.79 | 360.62 |
| 88  | BA | UDCA        | 9.60   | 5.79    | 5.14    | 21.98   | 28.60   | 3.24   | 5.97   | 46.13   | 18.92   | 6.33    | 3.10   | 2.44    | 17.20   | 2.92    | 4.27   | 2.27   | 117.00  | 2.10   | 3.69   | 20.90  |
| 89  | BA | HDCA        | 30.75  | 48.71   | 29.72   | 148.48  | 133.85  | 118.36 | 54.33  | 650.39  | 399.13  | 41.82   | 44.12  | 14.58   | 203.42  | 81.70   | 44.19  | 72.23  | 644.62  | 2.47   | 68.57  | 102.94 |
| 90  | BA | DHCA        | 43.68  | 121.59  | 112.02  | 106.67  | 187.62  | 32.15  | 38.68  | 67.39   | 53.53   | 71.54   | 37.17  | 65.42   | 174.06  | 90.82   | 55.13  | 68.43  | 113.37  | 53.88  | 52.03  | 51.50  |
| 91  | BA | 7 ketoDCA   | 197.11 | 1406.84 | 780.17  | 1174.63 | 1434.32 | 24.24  | 151.09 | 575.33  | 396.18  | 479.37  | 26.79  | 520.92  | 1102.34 | 413.70  | 47.23  | 131.32 | 413.94  | 30.12  | 62.17  | 181.20 |
| 92  | BA | 12 ketoCDCA | 92.55  | 38.13   | 17.63   | 257.57  | 104.28  | 48.59  | 99.49  | 49.39   | 55.92   | 7.15    | 50.77  | 0.72    | 0.31    | 0.48    | 2.18   | 14.03  | 2.41    | 0.99   | 3.53   | 0.35   |
| 93  | BA | dehydro_LCA | 0.22   | 1.45    | 0.28    | 0.14    | 0.10    | 0.23   | 0.32   | 15.41   | 0.74    | 0.29    | 0.77   | 0.59    | 14.10   | 0.35    | 0.55   | 0.24   | 3.17    | 1.12   | 0.90   | 0.08   |
| 94  | BA | 23_nor_DCA  | 25.63  | 10.98   | 16.56   | 4.06    | 9.56    | 8.38   | 8.40   | 15.47   | 15.36   | 2.88    | 10.41  | 11.72   | 4.88    | 6.85    | 30.58  | 2.28   | 8.09    | 23.95  | 35.60  | 10.81  |
| 95  | BA | 6 ketoLCA   | 19.77  | 22.07   | 27.06   | 52.86   | 76.19   | 15.21  | 12.73  | 71.99   | 28.54   | 31.62   | 11.22  | 13.04   | 88.42   | 20.47   | 9.06   | 9.28   | 72.79   | 6.25   | 6.17   | 48.65  |
| 96  | BA | 7 ketoLCA   | 153.33 | 137.13  | 135.79  | 149.27  | 147.63  | 111.56 | 94.13  | 119.75  | 93.41   | 123.68  | 100.44 | 123.82  | 123.29  | 123.67  | 99.04  | 120.13 | 123.78  | 109.77 | 94.11  | 126.12 |
| 97  | BA | 12 ketoLCA  | 0.01   | 0.12    | 0.00    | 4.73    | 0.02    | 0.05   | 0.00   | 13.66   | 0.00    | 0.30    | 0.00   | 0.00    | 0.12    | 0.84    | 0.00   | 0.27   | 32.16   | 0.12   | 0.42   | 0.00   |
| 98  | BA | apo_CA      | 3.34   | 4.54    | 0.23    | 2.78    | 2.46    | 4.01   | 0.12   | 11.48   | 7.16    | 1.15    | 0.20   | 0.47    | 19.45   | 5.79    | 2.06   | 0.09   | 16.44   | 0.40   | 0.09   | 3.15   |
| 99  | BA | muroCA      | 2.96   | 0.87    | 4.26    | 19.19   | 0.39    | 0.91   | 4.72   | 20.89   | 6.40    | 9.24    | 1.04   | 5.66    | 0.89    | 1.03    | 0.59   | 6.28   | 30.85   | 1.69   | 2.76   | 9.29   |
| 100 | BA | beta-UDCA   | 18.93  | 26.57   | 10.66   | 44.53   | 117.88  | 2.42   | 1.11   | 78.45   | 12.23   | 12.60   | 0.15   | 0.11    | 58.89   | 2.60    | 0.64   | 1.49   | 40.53   | 0.75   | 2.60   | 29.53  |
| 101 | BA | 3-ketoCA    | 124.42 | 156.37  | 125.60  | 191.56  | 146.81  | 143.14 | 124.86 | 296.36  | 207.80  | 138.00  | 120.03 | 106.19  | 486.41  | 147.26  | 124.88 | 136.76 | 498.17  | 104.02 | 127.07 | 153.89 |
| 102 | BA | ACA         | 436.74 | 456.99  | 285.08  | 785.95  | 879.03  | 149.23 | 155.12 | 856.36  | 399.72  | 327.60  | 133.09 | 166.58  | 816.79  | 215.07  | 178.91 | 113.51 | 823.20  | 33.11  | 50.11  | 502.33 |
| 103 | BA | TCA         | 167.44 | 501.40  | 151.67  | 533.32  | 700.51  | 30.96  | 69.98  | 486.84  | 590.84  | 431.25  | 34.09  | 494.09  | 1526.50 | 477.73  | 129.11 | 253.63 | 758.22  | 286.68 | 243.56 | 248.42 |
| 104 | BA | TCDCA       | 3.70   | 4.66    | 3.46    | 6.50    | 3.83    | 2.53   | 2.79   | 3.53    | 3.55    | 2.34    | 1.86   | 2.76    | 3.46    | 2.56    | 2.96   | 3.38   | 4.20    | 2.31   | 2.19   | 2.90   |
| 105 | BA | TaMCA       | 39.42  | 161.69  | 37.64   | 178.15  | 163.66  | 6.09   | 16.27  | 84.20   | 149.48  | 84.42   | 12.98  | 18.81   | 222.37  | 108.14  | 25.33  | 49.53  | 192.97  | 21.28  | 43.70  | 31.66  |
| 106 | BA | TbMCA       | 576.72 | 1099.43 | 340.89  | 940.54  | 914.41  | 424.07 | 579.65 | 3016.05 | 2095.36 | 348.89  | 393.83 | 562.29  | 938.17  | 1111.80 | 438.80 | 794.78 | 1866.32 | 532.05 | 713.99 | 383.12 |
| 107 | BA | TwMCA       | 41.85  | 105.07  | 86.53   | 69.82   | 233.12  | 29.79  | 78.41  | 258.00  | 348.45  | 59.57   | 72.93  | 58.95   | 198.83  | 118.14  | 34.56  | 53.33  | 155.75  | 36.82  | 98.16  | 62.16  |
| 108 | BA | TDCA        | 7.87   | 8.51    | 10.83   | 13.91   | 16.99   | 9.06   | 10.88  | 11.06   | 6.76    | 7.50    | 8.75   | 8.45    | 13.72   | 10.35   | 8.05   | 11.54  | 13.69   | 10.97  | 6.49   | 7.99   |
| 109 | BA | TLCA        | 0.32   | 0.29    | 0.23    | 1.78    | 2.80    | 0.29   | 0.54   | 0.65    | 0.28    | 1.51    | 0.46   | 0.62    | 0.39    | 0.30    | 16.18  | 0.29   | 0.39    | 0.29   | 0.20   | 0.37   |
| 110 | BA | TUDCA       | 78.16  | 108.33  | 69.94   | 489.96  | 265.04  | 126.06 | 92.74  | 418.36  | 254.18  | 321.45  | 52.81  | 61.54   | 314.80  | 99.81   | 111.94 | 140.77 | 1062.03 | 10.30  | 134.60 | 351.98 |
| 111 | BA | THCA        | 13.91  | 264.84  | 121.52  | 162.00  | 160.46  | 29.94  | 34.06  | 534.32  | 298.84  | 111.07  | 18.72  | 118.20  | 340.40  | 216.50  | 41.77  | 76.94  | 506.44  | 84.29  | 121.76 | 40.29  |
| 112 | BA | THDCA       | 11.23  | 11.35   | 11.15   | 11.55   | 11.48   | 11.30  | 11.31  | 13.04   | 11.46   | 11.18   | 11.15  | 11.34   | 11.34   | 11.34   | 34.44  | 11.29  | 11.89   | 11.48  | 11.19  | 11.37  |
| 113 | BA | GCDCA       | 422.76 | 1613.93 | 868.40  | 2726.37 | 1871.01 | 538.10 | 686.09 | 3671.23 | 1987.89 | 1450.95 | 457.43 | 182.02  | 893.85  | 188.48  | 137.12 | 139.66 | 2042.44 | 21.17  | 516.51 | 638.43 |
| 114 | BA | GDCA        | 0.61   | 0.10    | 0.63    | 0.90    | 0.08    | 0.62   | 0.28   | 0.15    | 0.37    | 0.24    | 0.84   | 0.66    | 0.09    | 0.66    | 0.09   | 0.13   | 1.49    | 5.19   | 0.26   | 0.21   |
| 115 | BA | GLCA        | 3.22   | 1.61    | 0.15    | 89.02   | 69.00   | 1.40   | 22.08  | 255.74  | 11.41   | 2.95    | 0.12   | 0.17    | 0.12    | 0.18    | 23.01  | 0.29   | 107.59  | 2.14   | 30.12  | 12.96  |
| 116 | BA | GUDCA       | 157.63 | 168.71  | 154.03  | 296.47  | 192.49  | 158.38 | 159.84 | 251.38  | 169.98  | 190.97  | 150.91 | 139.11  | 165.84  | 152.20  | 151.66 | 140.80 | 275.49  | 136.13 | 157.51 | 165.84 |
